# Supplementary material
Source: Springer Nature journal article supplement (https://www.springermedizin.de/resource/supplementary/12936_2010_1295_MOESM3_ESM.pdf/9549436)
Supplement: MOESM3 [file 9549436]

## SafePill-Net

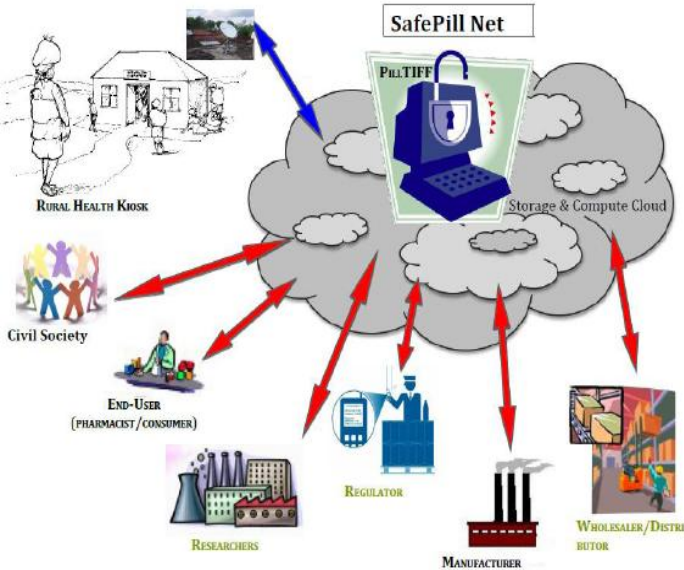

- MicroRaman system may be sensitive enough to detect standard signature of single pill
- Useful at local eHealth Kiosk level but also for system wide monitoring
- BioTIFF enables co-localizing meta-data with primary data
- BioTIFF facilitates cloud based accessioning, curating and reinterpreting original data
- BioTIFF format enables encrypting, regulating and monitoring access
- Allows medicine authenticity to be tracked at multiple levels for multiple purposes
- Allows for creation of a community of practice focused on medicine authentication
- Allows tracking of social determinants of Biopharmaceutics

Amazon S3 service allows storage of arbitrary 5GB buckets (\$0.60/month)  
Data can be indexed and analyzed using Apache Hadoop MapReduce  
<http://aws.amazon.com/s3/>
